# Supplementary material for: Mutation-driven parallel evolution in emergence of ACE2-utilizing sarbecoviruses
Source: Front Microbiol. 2023 Feb 23;14:1118025. doi: 10.3389/fmicb.2023.1118025 (PMC9996049; doi:10.3389/fmicb.2023.1118025)
Supplement: Supplementary file 1 [file Table_1.XLSX]

## Sheet: Sheet1
Appendix 1. Multiple sequence alignment of the receptor-binding domains (RBDs) of sarbecoviruses		Accession number	Origin
HKU3-2	PNITNRCPFDKVFNATRFPNVYAWERTKISDCVADYTVLYNST-SFSTFKCYGVSPSKLIDLCFTSVYADTFLIRSSEVRQVAPGETGVIADYNYKLPDD	AAZ41329.1	Bat
HKU3	PNITNRCPFDKVFNATRFPNVYAWERTKISDCVADYTVLYNST-SFSTFKCYGVSPSKLIDLCFTSVYADTFLIRSSEVRQVAPGETGVIADYNYKLPDD	Q3LZX1.1	Bat
HKU3-4	PNITNRCPFDKVFNATRFPNVYAWERTKISDCVADYTVLYNST-SFSTFKCYGVSPSKLIDLCFTSVYADTFLIRSSEVRQVAPGETGVIADYNYKLPDD	ADE34722.1	Bat
HKU3-13	PNITNRCPFDKVFNATRFPNVYAWERTKISDCVADYTVLYNST-SFSTFKCYGVSPSKLIDLCFTSVYADTFLIRSSEVRQVAPGETGVIADYNYKLPDD	ADE34823.1	Bat
HKU3-12	PNITNRCPFDKVFNATRFPNVYAWERTKISDCVADYTVLYNST-SFSTFKCYGVSPSKLIDLCFTSVYADTFLIRSSEVRQVAPGETGVIADYNYKLPDD	ADE34812.1	Bat
GX2013	PNITNRCPFDKVFNATRFPNVYAWERTKISDCVADYTVLYNST-SFSTFKCYGVSPSKLIDLCFTSVYADTFLIRSSEVRQVAPGETGVIADYNYKLPDD	AIA62320.1	Bat
Rs806	PNITNRCPFDKVFNATRFPNVYAWERTKISDCVADYTVLYNST-SFSTFKCYGVSPSKLIDLCFTSVYADTFLIRSSEVRQVAPGETGVIADYNYKLPDD	ACU31051.1	Bat
Longquan-140	PNITNRCPFDKVFNVTRFPNVYAWERTKISDCVADYTVLYNST-SFSTFKCYGVSPSKLIDLCFTSVYADTFLIRSSEVRQVAPGETGVIADYNYKLPDD	AID16716.1	Bat
YN2018A	PNITNRCPFDKVFNASRFPNVYAWERTKISDCVADYTVLYNST-SFSTFKCYGVSPSKLIDLCFTSVYADTFLIRSSEVRQVAPGETGVIADYNYKLPDD	QDF43820.1	Bat
Rs4247	PNITNRCPFDKVFNASRFPNVYAWERTKISDCVADYTVLYNST-SFSTFKCYGVSPSKLIDLCFTSVYADTFLIRSSEVRQVAPGETGVIADYNYKLPDD	ATO98181.1	Bat
HKU3-8	PNITNRCPFDRVFNASRFPSVYAWERTKISECVADYTVLYNST-SFSTFKCYGVSPSKLIDLCFTSVYADTFLIRSSEVRQVAPGETGVIADYNYKLPDD	ADE34766.1	Bat
HKU3-7	PNITNRCPFDRVFNASRFPSVYAWERTKISECVADYTVLYNST-SFSTFKCYGVSPSKLIDLCFTSVYADTFLIRSSEVRQVAPGETGVIADYNYKLPDD	ADE34755.1	Bat
BtRs-HuB2013	PNITNRCPFDRVFNASRFPSVYAWERTKISDCVADYTVLYNST-SFSTFKCYGVSPSKLIDLCFTSVYADTFLIRSSEVRQVAPGETGVIADYNYKLPDD	AIA62310.1	Bat
SC2018	PNITNRCPFDKVFNASRFPSVYAWERIKISDCVADYTVLYNST-SFSTFKCYGVSPSKLIDLCFTSVYADTFLIRSSEVRQVAPGETGVIADYNYKLPDD	QDF43815.1	Bat
Rs4085	--------------------------------VADYTVLYNST-SFSTFKCYGVSPSKLIDLCFTSVYADTFLIRSSEVRQVAPGETGVIADYNYKLPDD	AGZ48791	Bat
Rs672	PNITNRCPFDKVFNASRFPNVYAWERTKISDCVADYTVLYNST-SFSTFKCYGVSPSKLIDLCFTSVYADTFLIRSSEVRQVAPGETGVIADYNYKLPDD	ACU31032.1	Bat
Rs4081	PNITNRCPFDKVFNASRFPNVYAWERTKISDCVADYTVLYNST-SFSTFKCYGVSPSKLIDLCFTSVYADTFLIRSSEVRQVAPGETGVIADYNYKLPDD	ATO98120.1	Bat
YN2018D	PNITNRCPFDKVFNASRFPNVYAWERTKISDCVADYTVLYNST-SFSTFKCYGVSPSKLIDLCFTSVYADTFLIRSSEVRQVAPGETGVIADYNYKLPDD	QDF43835.1	Bat
Rs4237	PNITNRCPFDKVFNASRFPNVYAWERTKISDCVADYTVLYNST-SFSTFKCYGVSPSKLIDLCFTSVYADTFLIRSSEVRQVAPGETGVIADYNYKLPDD	ATO98169.1	Bat
Rs4255	PNITNRCPFDKVFNASRFPNVYAWERTKISDCVADYTVLYNST-SFSTFKCYGVSPSKLIDLCFTSVYADTFLIRSSEVRQVAPGETGVIADYNYKLPDD	ATO98193.1	Bat
MLHJC35	PNITNRCPFDRVFNASRFPSVYAWERTKISDCVADYTVLYNST-SFSTFKCYGVSPSKLIDLCFTSVYADTFLIRSSEVRQVAPGETGVIADYNYKLPDE	ANA96090.1	Bat
Cp/Yunnan2011	PNITNRCPFDRVFNASRFPSVYAWERTKISDCVADYTVLYNST-SFSTFKCYGVSPSKLIDLCFTSVYADTFLIRFSEVRQIAPGETGVIADYNYKLPDE	AGC74176.1	Bat
YN2018C	PNITNRCPFDKVFNATRFPSVYAWERTKISDCVADYTVLYNST-SFSTFKCYGVSPSKLIDLCFTSVYADTFLIRSSEVRQVAPGETGVIADYNYKLPDD	QDF43830.1	Bat
As6526	PNITNRCPFDKVFNATRFPSVYAWERTKISDCVADYTVLYNST-SFSTFKCYGVSPSKLIDLCFTSVYADTFLIRSSEVRQVAPGETGVIADYNYKLPDD	ATO98108.1	Bat
BatCoV279-2005	PNITNRCPFDKVFNASRFPNVYAWERTKISDCVADYTVLYNST-SFSTFKCYGVSPSKLIDLCFTSVYADTFLIRSSEVRQVAPGETGVIADYNYKLPDD	Q0Q475.1	Bat
Rm1/2004	PNITNRCPFDKVFNASRFPNVYAWERTKISDCVADYTVLYNST-SFSTFKCYGVSPSKLIDLCFTSVYADTFLIRSSEVRQVAPGETGVIADYNYKLPDD	ABD75332.1	Bat
Rp/Shaanxi2011	PNITNRCPFDKVFNATRFPSVYAWERTKISDCVADYTVLYNST-SFSTFKCYGVSPSKLIDLCFTSVYADTFLIRSSEVRQVAPGETGVIADYNYKLPDD	AGC74165.1	Bat
Rp3/2004	PNITNRCPFDKVFNATRFPNVYAWERTKISDCVADYTVLYNST-SFSTFKCYGVSPSKLIDLCFTSVYADTFLIRSSEVRQVAPGETGVIADYNYKLPDD	Q3I5J5.1	Bat
YNLF_34C	PNITNLCPFDKVFNATRFPSVYAWERTKISDCVADYTVFYNST-SFSTFNCYGVSPSKLIDLCFTSVYADTFLIRFSEVRQVAPGQTGVIADYNYKLPDD	AKZ19087.1	Bat
YNLF_31C	PNITNLCPFDKVFNATRFPSVYAWERTKISDCVADYTVFYNST-SFSTFNCYGVSPSKLIDLCFTSVYADTFLIRFSEVRQVAPGQTGVIADYNYKLPDD	AKZ19076.1	Bat
BtRf-BetaCoV/HuB2013	PNITNLCPFDKVFNATRFPSVYAWERTKISDCVADYTVFYNST-SFSTFNCYGVSPSKLIDLCFTSVYADTFLIRFSEVRQVAPGQTGVIADYNYKLPDD	AIA62340	Bat
Rf12004	PNITNLCPFDKVFNATRFPSVYAWERTKISDCVADYTVFYNST-SFSTFNCYGVSPSKLIDLCFTSVYADTFLIRFSEVRQVAPGQTGVIADYNYKLPDD	ABD75323.1	Bat
BtRf-SX2013	PNITNLCPFDKVFNATRFPSVYAWERTKISDCVADYTVFYNST-SFSTFNCYGVSPSKLIDLCFTSVYADTFLIRFSEVRQVAPGQTGVIADYNYKLPDD	AIA62300.1	Bat
BtRf-BetaCoV/HeB2013	PNITNLCPFDKVFNATRFPSVYAWERTKISDCVADYTVFYNST-SFSTFNCYGVSPSKLIDLCFTSVYADTFLIRFSEVRQVAPGQTGVIADYNYKLPDD	AIA62290	Bat
Jiyuan-84	PNITNLCPFDKVFNATRFPSVYAWERTKISDCVADYTVFYNST-SFSTFNCYGVSPSKLIDLCFTSVYADTFLIRFSEVRQVAPGQTGVIADYNYKLPDD	ARI44809.1	Bat
BtRf-HeN2013	PNITNLCPFDKVFNATRFPSVYAWERTKISDCVADYTVFYNST-SFSTFNCYGVSPSKLIDLCFTSVYADTFLIRFSEVRQVAPGQTGVIADYNYKLPDD	AIA62339.1	Bat
B15-21	PNITNVCPFDKVFNATRFPSVYAWERTKISDCVADYTVFYNST-SFSTFNCYGVSPSKLIDLCFTSVYADTFLIRFSEVRQVAPGQTGVIADYNYKLPDD	ANH10613.1	Bat
16BO133	PNITNVCPFDKVFNATRFPSVYAWERTKISDCVADYTVFYNST-SFSTFNCYGVSPSKLIDLCFTSVYADTFLIRFSEVRQVAPGQTGVIADYNYKLPDD	ASO66810.1	Bat
BtRf-JL2012	PNITNVCPFDKVFNATRFPSVYAWERTKISDCVADYTVFYNST-SFSTFNCYGVSPSKLIDLCFTSVYADTFLIRFSEVRQVAPGQTGVIADYNYKLPDD	AIA62277.1	Bat
JTMC15	PNITNVCPFDKVFNATRFPSVYAWERTKISDCVADYTVFYNST-SFSTFNCYGVSPSKLIDLCFTSVYADTFLIRFSEVRQVAPGQTGVIADYNYKLPDD	ANA96027.1	Bat
BtCoV/273/2005	PNITNLCPFDKVFNATRFPSVYAWERTKISDCVADYTVFYNST-SFSTFNCYGVSPSKLIDLCFTSVYADTFLIRFSEVRQVAPGQTGVIADYNYKLPDD	ABG47060.1	Bat
F46	PNITNLCPFDAVFNATRFPSVYAWERVKISNCVADYTAFYNST-SFSTFKCYGVSPSKLIDLCFTSVYADTFLIRFSEVRQVAPGETGVIADYNYKLPDD	ARO76382.1	Bat
Rs4075	................................VADYTAFYNST-SFSTFKCYGVSPSKLIDLCFTSVYADTFLIRFSEVRQVAPGETGVIADYNYKLPDD	AGZ48792	Bat
Rf4092	PNITNLCPFDAVFNATRFPSVYAWERVKISNCVADYTAFYNST-SFSTFKCYGVSPSKLIDLCFTSVYADTFLIRFSEVRQVAPGETGVIADYNYKLPDD	ATO98145.1	Bat
Bat-SL-CoVZXC21	PNITNVCPFHKVFNATRFPSVYAWERTKISDCIADYTVFYNST-SFSTFKCYGVSPSKLIDLCFTSVYADTFLIRFSEVRQVAPGQTGVIADYNYKLPDD	AVP78042.1	Bat
Bat-SL-CoVZC45	PNITNVCPFHKVFNATRFPSVYAWERTKISDCIADYTVFYNST-SFSTFKCYGVSPSKLIDLCFTSVYADTFLIRFSEVRQVAPGQTGVIADYNYKLPDD	AVP78031.1	Bat
BtRs-BetaCoV/YN2013	PNITNRCPFDSIFNASRFPSVYAWERTKISDCVADYTVLYNST-LFSTFKCYGVSPSKLIDLCFTSVYADTFLIRFSEVRQVAPGETGVIADYNYRLPDD	AIA62330.1	Bat
Anlong-103	PNITNRCPFDSIFNASRFPSVYAWERTKISDCVADYTVLYNST-SFSTFKCYGVSPSKLIDLCFTSVYADTFLIRFSEVRQVAPGETGVIADYNYRLPDD	ARI44799.1	Bat
Wuhan-Hu-1	PNITNLCPFGEVFNATRFASVYAWNRKRISNCVADYSVLYNSA-SFSTFKCYGVSPTKLNDLCFTNVYADSFVIRGDEVRQIAPGQTGKIADYNYKLPDD	YP_009724390.1	Human
WIV02	PNITNLCPFGEVFNATRFASVYAWNRKRISNCVADYSVLYNSA-SFSTFKCYGVSPTKLNDLCFTNVYADSFVIRGDEVRQIAPGQTGKIADYNYKLPDD	QHR63250.1	Human
RaTG13	PNITNLCPFGEVFNATTFASVYAWNRKRISNCVADYSVLYNST-SFSTFKCYGVSPTKLNDLCFTNVYADSFVITGDEVRQIAPGQTGKIADYNYKLPDD	QHR63300.1	Bat
Civet014	PNITNLCPFGEVFNATKFPSVYAWERKRISNCVADYSVLYNST-SFSTFKCYGVSATKLNDLCFSNVYADSFVVKGDDVRQIAPGQTGVIADYNYKLPDD	AAU04661.1	palm civet
PC4-137	PNITNLCPFGEVFNATKFPSVYAWERKRISNCVADYSVLYNST-SFSTFKCYGVSATKLNDLCFSNVYADSFVVKGDDVRQIAPGQTGVIADYNYKLPDD	AAV49720.1	palm civet
WF188	PNITNLCPFGEVFNATKFPSVYAWERKRISNCVADYSVLYNST-FFSTFKCYGVSATKLNDLCFSNVYADSFVVKGDDVRQIAPGQTGVIADYNYKLPDD	ABF68955.1	palm civet
ES191	PNITNLCPFGEVFNATKFPSVYAWERKRISNCVADYSVLYNST-FFSTFKCYGVSATKLNDLCFSNVYADSFVVKGDDVRQIAPGQTGVIADYNYKLPDD	ABF68956.1	palm civet
CS21	PNITNLCPFGEVFNATKFPSVYAWERKKISNCVADYSVLYNST-FFSTFKCYGVSATKLNDLCFSNVYADSFVVKGDDVRQIAPGQTGVIADYNYKLPDD	ABF68958.1	palm civet
GZ02	PNITNLCPFGEVFNATKFPSVYAWERKRISNCVADYSVLYNST-FFSTFKCYGVSATKLNDLCFSNVYADSFVVKGDDVRQIAPGQTGVIADYNYKLPDD	AAS00003.1	Human
LYRa3	PNITNLCPFGEVFNATTFPSVYAWERKRISNCVADYSVLYNST-SFSTFKCYGVSAIKLNDLCFSNVYADSFVVKGDDVRQIAPGQTGVIADYNYKLPDD	AHX37569.1	Bat
LYRa11	PNITNLCPFGEVFNATTFPSVYAWERKRISNCVADYSVLYNST-SFSTFKCYGVSAIKLNDLCFSNVYADSFVVKGDDVRQIAPGQTGVIADYNYKLPDD	AHX37558.1	Bat
BtRs-BetaCoV/YN2018B	PNITNLCPFGEVFNATTFPSVYAWERKRISNCVADYSVLYNST-SFSTFKCYGVSATKLNDLCFSNVYADSFVVKGDDVRQIAPGQTGVIADYNYKLPDD	QDF43825	Bat
Rs7327	PNITNLCPFGEVFNATTFPSVYAWERKRISNCVADYSVLYNST-SFSTFKCYGVSATKLNDLCFSNVYADSFVVKGDDVRQIAPGQTGVIADYNYKLPDD	ATO98218.1	Bat
Rs9401	PNITNLCPFGEVFNATTFPSVYAWERKRISNCVADYSVLYNST-SFSTFKCYGVSATKLNDLCFSNVYADSFVVKGDDVRQIAPGQTGVIADYNYKLPDD	ATO98231.1	Bat
WIV16	PNITNLCPFGEVFNATTFPSVYAWERKRISNCVADYSVLYNST-SFSTFKCYGVSATKLNDLCFSNVYADSFVVKGDDVRQIAPGQTGVIADYNYKLPDD	ALK02457.1	Bat
Rs4874	PNITNLCPFGEVFNATTFPSVYAWERKRISNCVADYSVLYNST-SFSTFKCYGVSATKLNDLCFSNVYADSFVVKGDDVRQIAPGQTGVIADYNYKLPDD	ATO98205.1	Bat
Rs3367	PNITNLCPFGEVFNATTFPSVYAWERKRISNCVADYSVLYNST-SFSTFKCYGVSATKLNDLCFSNVYADSFVVKGDDVRQIAPGQTGVIADYNYKLPDD	AGZ48818.1	Bat
WIV1	PNITNLCPFGEVFNATTFPSVYAWERKRISNCVADYSVLYNST-SFSTFKCYGVSATKLNDLCFSNVYADSFVVKGDDVRQIAPGQTGVIADYNYKLPDD	AGZ48828.1	Bat
RsSHC014	PNITNLCPFGEVFNATTFPSVYAWERKRISNCVADYSVLYNST-SFSTFKCYGVSATKLNDLCFSNVYADSFVVKGDDVRQIAPGQTGVIADYNYKLPDD	AGZ48806.1	Bat
Rs4084	PNITNLCPFGEVFNATTFPSVYAWERKRISNCVADYSILYNST-SFSTFKCYGVSATKLNDLCFSNVYADSFVVKGDDVRQIAPGQTGVIADYNYKLPDD	ATO98132.1	Bat
Rs4231	PNITNLCPFGEVFNATTFPSVYAWERKRISNCVADYSVLYNST-SFSTFKCYGVSATKLNDLCFSNVYADSFVVKGDDVRQIAPGQTGVIADYNYKLPDD	ATO98157.1	Bat
BatCoV-BM48-31-BGR-2008	PNITQLCPFNEVFNITSFPSVYAWERMRITNCVADYSVLYNSSASFSTFQCYGVSPTKLNDLCFSSVYADYFVVKGDDVRQIAPAQTGVIADYNYKLPDD	GU190215.1	Bat
BatCoV-BB9904-BGR-2008	PNITKLCPFDQVFNASSFPSVYAWERVRITDCVANYAVLYNSSVSFSTFQCYGVSPTKLNDLCFSSVYADYFIVKGDDVRQIAPSQTGVIADYNYKLPDD	KR559017.1	Bat
BtKY72	PNITNLCPFGQVFNASNFPSVYAWERLRISDCVADYAVLYNSSSSFSTFKCYGVSPTKLNDLCFSSVYADYFVVKGDDVRQIAPAQTGVIADYNYKLPDD	APO40579.1	Bat
HKU3-2	FTGCVIAWNTAKHD---TG--NYYYRSHRKTKLKPFERDLS----SDDG---------NGVYTLSTYDFNPNVPVAYQATRVVVLSFELLNAPATVCGP
HKU3	FTGCVIAWNTAKHD---TG--NYYYRSHRKTKLKPFERDLS----SDDG---------NGVYTLSTYDFNPNVPVAYQATRVVVLSFELLNAPATVCGP
HKU3-4	FTGCVIAWNTAKHD---TG--NYYYRSHRKTKLKPFERDLS----SDDG---------NGVYTLSTYDFNPNVPVAYQATRVVVLSFELLNAPATVCGP
HKU3-13	FTGCVIAWNTAKHD---TG--NYYYRSHRKTKLKPFERDLS----SDDG---------NGVYTLSTYDFNPNVPVAYQATRVVVLSFELLNAPATVCGP
HKU3-12	FTGCVIAWNTAKHD---TG--NYYYRSHRKTKLKPFERDLS----SDDG---------NGVYTLSTYDFNPNVPVAYQATRVVVLSFELLNAPATVCGP
GX2013	FTGCVIAWNTAKQD---TG--NYYYRSHRKTKLKPFERDLS----SDDG---------NGVYTLSTYDFNPNVPVAYQATRVVVLSFELLNAPATVCGP
Rs806	FTGCVIAWNTAKQD---TG--NYYYRSHRKTKLKPFERDLS----SDD----------DGVYTLSTYDFNPNVPVAYQATRVVVLSFELLNAPATVCGP
Longquan-140	FTGCVIAWNTAKQD---IG--NYYYRSHRKTKLKPFERDLS----SDDG---------NGVYTLSTYDFNPNVPVAYQATRVVVLSFELLNAPATVCGP
YN2018A	FTGCVIAWNTAKQD---TG--HYYYRSHRKTKLKPFERDLS----SDDG---------NGVYTLSTYDFNPNVPVAYQATRVVVLSFELLNAPATVCGP
Rs4247	FTGCVIAWNTAKQD---TG--HYYYRSHRKTKLKPFERDLS----SDDG---------NGVYTLSTYDFNPNVPVAYQATRVVVLSFELLNAPATVCGP
HKU3-8	FTGCVIAWNTAKQD---TG--NYYYRSHRKTKLKPFERDLS----SDDG---------NGVYTLSTYDFNPNVPVAYQATRVVVLSFELLNAPATVCGP
HKU3-7	FTGCVIAWNTAKQD---TG--NYYYRSHRKTKLKPFERDLS----SDDG---------NGVYTLSTYDFNPNVPVAYQATRVVVLSFELLNAPATVCGP
BtRs-HuB2013	FTGCVIAWNTAKQD---TG--YYYYRSHRKTKLKPFERDLS----SDDG---------NGVYTLSTYDFNPNVPVAYQATRVVVLSFELLNAPATVCGP
SC2018	FTGCVIAWNTAKQD---TG--SYYYRSHRKTKLKPFERDLS----SDDG---------NGVYTLSTYDFNPNVPVAYQATRVVVLSFELLNAPATVCGP
Rs4085	FTGCVIAWNTAKQD---TG--HYYYRSHRKTKLKPFERDLS----SDDG---------NGVYTLSTYDFNPNVPVAYQATRVVVLSFELLNAPATVCGP
Rs672	FTGCVIAWNTAKQD---QG--QYYYRSSRKTKLKPFERDLT----SDE----------NGVRTLSTYDFYPNVPIEYQATRVVVLSFELLNAPATVCGP
Rs4081	FTGCVIAWNTAKQD---QG--QYYYRSSRKTKLKPFERDLT----SDE----------NGVRTLSTYDFYPNVPIEYQATRVVVLSFELLNAPATVCGP
YN2018D	FTGCVIAWNTAKQD---QG--QYYYRSSRKTKLKPFERDLT----SDE----------NGVRTLSTYDFYPNVPIEYQATRVVVLSFELLNAPATVCGP
Rs4237	FTGCVIAWNTAKQD---QG--QYYYRSSRKTKLKPFERDLS----SDE----------NGVRTLSTYDFYPTVPIEYQATRVVVLSFELLNAPATVCGP
Rs4255	FTGCVIAWNTAKQD---QG--QYYYRSSRKTKLKPFERDLS----SDE----------NGVRTLSTYDFYPTVPIEYQATRVVVLSFELLNAPATVCGP
MLHJC35	FTGCVIAWNTAKQD---QG--QYYYRSSRKTKLKPFERDLS----SDE----------NGVRTLSTYDFYPTVPIEYQATRVVVLSFELLNAPATVCGP
Cp/Yunnan2011	FTGCVIAWNTANQD---RG--QYYYRSSRKTKLKPFERDLS----SDE----------NGVRTLSTYDFYPSVPLEYQATRVVVLSFELLNAPATVCGP
YN2018C	FTGCVIAWNTAQQD---KG--QYYYRSSRKTKLKPFERDLS----SDE----------NGVRTLSTYDFYPTVPIEYQATRVVVLSFELLNAPATVCGP
As6526	FTGCVIAWNTAQQD---KG--QYYYRSSRKTKLKPFERDLS----SDE----------NGVRTLSTYDFYPTVPIEYQATRVVVLSFELLNAPATVCGP
BatCoV279-2005	FTGCVIAWNTAQQD---QG--QYYYRSYRKEKLKPFERDLS----SDE----------NGVYTLSTYDFYPSIPVEYQATRVVVLSFELLNAPATVCGP
Rm1/2004	FTGCVIAWNTAQQD---QG--QYYYRSYRKEKLKPFERDLS----SDE----------NGVYTLSTYDFYPSIPVEYQATRVVVLSFELLNAPATVCGP
Rp/Shaanxi2011	FTGCVIAWNTANQD---QG--QYYYRSSRKEKLKPFERDLS----SDE----------NGVYTLSTYDFYPSVPLDYQATRVVVLSFELLNAPATVCGP
Rp3/2004	FTGCVIAWNTAKQD---QG--QYYYRSHRKTKLKPFERDLS----SDE----------NGVRTLSTYDFYPSVPVAYQATRVVVLSFELLNAPATVCGP
YNLF_34C	FTGCVIAWNTAKYD---VG--SYFYRSHRSSKLKPFERDLS----SEE----------NGARTLSTYDFNQNVPLEYQATRVVVLSFELLNAPATVCGP
YNLF_31C	FTGCVIAWNTAKYD---VG--SYFYRSHRSSKLKPFERDLS----SEE----------NGARTLSTYDFNQNVPLEYQATRVVVLSFELLNAPATVCGP
BtRf-BetaCoV/HuB2013	FTGCVIAWNTAKQD---VG--SYFYRSHRSSKLKPFERDLS----SEE----------NGVRTLSTYDFNQNVPLEYQATRVVVLSFELLNAPATVCGP
Rf12004	FTGCVIAWNTAKQD---VG--SYFYRSHRSSKLKPFERDLS----SEE----------NGVRTLSTYDFNQNVPLEYQATRVVVLSFELLNAPATVCGP
BtRf-SX2013	FTGCVIAWNTAKQD---VG--SYFYRSHRSSKLKPFERDLS----SEE----------NGVRTLSTYDFNQYVPLEYQATRVVVLSFELLNAPATVCGP
BtRf-BetaCoV/HeB2013	FTGCVIAWNTAKQD---VG--SYFYRSHRSSKLKPFERDLS----SEE----------NGVRTLSTYDFNQYVPLEYQATRVVVLSFELLNAPATVCGP
Jiyuan-84	FTGCVIAWNTAKQD---VG--SYFYRSHRSSKLKPFERDLS----SEE----------NGVRTLSTYDFNQYVPLEYQATRVVVLSFELLNAPATVCGP
BtRf-HeN2013	FTGCVIAWNTAKQD---VG--SYFYRSHRSSKLKPFERDLS----SEE----------NGVRTLSTYDFNQYVPLEYQATRVVVLSFELLNAPATVCGP
B15-21	FIGCVIAWNTAKQD---VG--SYFYRSHRSSKLKPFERDLS----SEE----------NGVLTLSTYDFNQNVPLEYQATRVVVLSFELLNAPATVCGP
16BO133	FIGCVIAWNTAKQD---VG--SYFYRSHRSSKLKPFERDLS----SEE----------NGVLTLSTYDFNQNVPLEYQATRVVVLSFELLNAPATVCGP
BtRf-JL2012	FIGCVIAWNTAKQD---VG--SYFYRSHRSSKLKPFERDLS----SEE----------NGVLTLSTYDFNQNVPLEYQATRVVVLSFELLNAPATVCGP
JTMC15	FIGCVIAWNTAKQD---VG--SYFYRSHRSSKLKPFERDLS----SEE----------NGVLTLSTYDFNQNVPLEYQATRVVVLSFELLNAPATVCGP
BtCoV/273/2005	FTGCVIAWNTAKQD---VG--SYFYRSHRSSKLKPFERDLS----SVE----------ENGRTLSTYDFNQNVPLEYQATRVVVLSFELLNAPATVCGP
F46	FTGCVIAWNTAKQD---VG--SYFYRSHRSSKLKPFERDLS----SDE----------NGVRTLSTYDFNPNVPLDYQATRVVVLSFELLNAPATVCGP
Rs4075	FTGCVIAWNTAKQD---VG--SYFYRSHRSSKLKPFERDLS----SDE----------NGVRTLSTYDFNPNVPLDYQATRVVVLSFELLNAPATVCGP
Rf4092	FTGCVIAWNTAKQD---VG--SYFYRSHRSSKLKPFERDLS----SDE----------NGVRTLSTYDFNPNVPLDYQATRVVVLSFELLNAPATVCGP
Bat-SL-CoVZXC21	FTGCVIAWNTAKQD---TG--HYFYRSHRSTKLKPFERDLS----SDE----------NGVRTLSTYDFNPNVPLEYQATRVVVLSFELLNAPATVCGP
Bat-SL-CoVZC45	FTGCVIAWNTAKQD---VG--NYFYRSHRSTKLKPFERDLS----SDE----------NGVRTLSTYDFNPNVPLEYQATRVVVLSFELLNAPATVCGP
BtRs-BetaCoV/YN2013	FTGCVIAWNTANQD---VG--SYFYRSHRSTKLKPFERDLS----SDE----------NGVRTLSTYDFNPNVPLDYQATRVVVLSFELLNAPATVCGP
Anlong-103	FTGCVIAWNTANQD---VG--SYFYRSHRSTKLKPFERDLS----SDE----------NGVRTLSTYDFNPYVPLDYQATRVVVLSFELLNAPATVCGP
Wuhan-Hu-1	FTGCVIAWNSNNLDSKVGGNYNYLYRLFRKSNLKPFERDISTEIYQAGSTPCNGVEGFNCYFPLQSYGFQPTNGVGYQPYRVVVLSFELLHAPATVCGP
WIV02	FTGCVIAWNSNNLDSKVGGNYNYLYRLFRKSNLKPFERDISTEIYQAGSTPCNGVEGFNCYFPLQSYGFQPTNGVGYQPYRVVVLSFELLHAPATVCGP
RaTG13	FTGCVIAWNSKHIDAKEGGNFNYLYRLFRKANLKPFERDISTEIYQAGSKPCNGQTGLNCYYPLYRYGFYPTDGVGHQPYRVVVLSFELLNAPATVCGP
Civet014	FMGCVLAWNTRNIDATSTGNYNYKYRYLRHGKLRPFERDISNVPFSPDGKPCTPP-APNCYWPLKGYGFYTTSGIGYQPYRVVVLSFELLNAPATVCGP
PC4-137	FMGCVLAWNTRNIDATSTGNYNYKYRYLRHGKLRPFERDISNVPFSPDGKPCTPP-APNCYWPLKGYGFYTTSGIGYQPYRVVVLSFELLNAPATVCGP
WF188	FMGCVLAWNTRNIDATSTGNYNYKYRYLRHGKLRPFERDISNVPFSPDGKPCTPP-APNCYWPLRGYGFYTTSGIGYQPYRVVVLSFELLNAPATVCGP
ES191	FMGCVLAWNTRNIDATSTGNYNYKYRYLRHGKLRPFERDISNVPFSPDGKPCTPP-APNCYWPLRGYGFYTTSGIGYQPYRVVVLSFELLNAPATVCGP
CS21	FMGCVLAWNTRNIDATSTGNYNYKYRYLRHGKLRPFERDISNVPFSPDGKPCTPP-APNCYWPLNGYGFYTTSGIGYQPYRVVVLSFELLNAPATVCGP
GZ02	FMGCVLAWNTRNIDATSTGNYNYKYRYLRHGKLRPFERDISNVPFSPDGKPCTPP-ALNCYWPLNDYGFYTTTGIGYQPYRVVVLSFELLNAPATVCGP
LYRa3	FMGCVLAWNTRNIDATSSGNFHYKYRSLRHGKLRPFERDISNVPFSPDGKPCTPP-AFNCYWPLNDYGFYTTNGIGYQPYRVVVLSFELLNAPATVCGP
LYRa11	FMGCVLAWNTRNIDATSSGNFNYKYRSLRHGKLRPFERDISNVPFSPDGKPCTPP-AFNCYWPLNDYGFYTTNGIGYQPYRVVVLSFELLNAPATVCGP
BtRs-BetaCoV/YN2018B	FMGCVLAWNTRNIDATSTGNYNYKYRSLRHGKLRPFERDISNVPFSPDGKPCTPP-AFNCYWPLNDYGFFTTNGIGYQPYRVVVLSFELLNAPATVCGP
Rs7327	FMGCVLAWNTRNIDATSTGNYNYKYRSLRHGKLRPFERDISNVPFSPDGKPCTPP-AFNCYWPLNDYGFFTTNGIGYQPYRVVVLSFELLNAPATVCGP
Rs9401	FMGCVLAWNTRNIDATSTGNYNYKYRSLRHGKLRPFERDISNVPFSPDGKPCTPP-AFNCYWPLNDYGFFTTNGIGYQPYRVVVLSFELLNAPATVCGP
WIV16	FTGCVLAWNTRNIDATQTGNYNYKYRSLRHGKLRPFERDISNVPFSPDGKPCTPP-AFNCYWPLNDYGFYITNGIGYQPYRVVVLSFELLNAPATVCGP
Rs4874	FTGCVLAWNTRNIDATQTGNYNYKYRSLRHGKLRPFERDISNVPFSPDGKPCTPP-AFNCYWPLNDYGFYITNGIGYQPYRVVVLSFELLNAPATVCGP
Rs3367	FTGCVLAWNTRNIDATQTGNYNYKYRSLRHGKLRPFERDISNVPFSPDGKPCTPP-AFNCYWPLNDYGFYITNGIGYQPYRVVVLSFELLNAPATVCGP
WIV1	FTGCVLAWNTRNIDATQTGNYNYKYRSLRHGKLRPFERDISNVPFSPDGKPCTPP-AFNCYWPLNDYGFYITNGIGYQPYRVVVLSFELLNAPATVCGP
RsSHC014	FLGCVLAWNTNSKDSSTSGNYNYLYRWVRRSKLNPYERDLSNDIYSPGGQSCSAV-GPNCYNPLRPYGFFTTAGVGHQPYRVVVLSFELLNAPATVCGP
Rs4084	FLGCVLAWNTNSKDSSTSGNYNYLYRWVRRSKLNPYERDLSNDIYSPGGQSCSAV-GPNCYNPLRPYGFFTTAGVGHQPYRVVVLSFELLNAPATVCGP
Rs4231	FLGCVLAWNTNSKDSSTSGNYNYLYRWVRRSKLNPYERDLSNDIYSPGGQSCSAI-GPNCYNPLRPYGFFTTAGVGHQPYRVVVLSFELLNAPATVCGP
BatCoV-BM48-31-BGR-2008	FTGCVIAWNTNSLDSS---N-EFFYRRFRHGKIKPYGRDLSNVLFNPSGGTCSAE-GLNCYKPLASYGFTQSSGIGFQPYRVVVLSFELLNAPATVCGP
BatCoV-BB9904-BGR-2008	FTGCVIAWNTNALDSN---K-DFYYRLFRHGKIKPYGRDLSNIPYSPSG-TCSTINNLNCFAPLKSYGFTQSSGISFQPYRVVVLSFELLNAPATVCGP
BtKY72	FTGCVLAWNTNSVDSK-SGN-NFYYRLFRHGKIKPYERDISNVLYNSAGGTCSSISQLGCYEPLKSYGFTPTVGVGYQPYRVVVLSFELLNAPATVCGP
Note: Dots represent the missing terminal sequences and gaps are introduced to maximize the alignment.
